# Supplementary material
Source: publisher site journal article supplement (https://www.dovepress.com/article/438674)
Supplement: Supplementary file 1 [file get_supplementary_file.php]

Supplemental Table 1. univariate analyses of independent risk factors related to treatment failure

| Variables | COX Regression | | | Generalized Estimated Equation | | |
| --- | --- | --- | --- | --- | --- | --- |
| Hazard Ratios | 95% CI | P value | Odds Ratios | 95% CI | P value |
| Lymphocyte count per 1 × 106/L increase | 0.250 | 0.120-0.520 | 0.001 | 0.217 | 0.085-0.554 | 0.001 |
| Gender (Male) | 1.025 | 0.598-1.757 | 0.927 | 1.040 | 0.574-1.883 | 0.897 |
| Age per 1 years increase | 1.003 | 0.983-1.023 | 0.771 | 1.004 | 0.982-1.026 | 0.749 |
| Dialysis age per 1 month increase | 1.007 | 1.000-1.014 | 0.056 | 1.008 | 1.000-1.017 | 0.053 |
| CCI per 1 increase | 1.011 | 0.908, 1.126 | 0.841 | 1.014 | 0.895, 1.148 | 0.829 |
| Etiology of kidney failure |  |  |  |  |  |  |
| Chronic nephritis | Reference | Reference | Reference | Reference | Reference | Reference |
| Diabetic nephropathy | 0.508 | 0.242-1.067 | 0.074 | 0.486 | 0.221-1.066 | 0.072 |
| Hypertensive nephropathy | 0.744 | 0.354-1.564 | 0.436 | 0.735 | 0.311-1.737 | 0.483 |
| Obstructive nephropathy | 1.372 | 0.474-3.967 | 0.560 | 1.472 | 0.328-6.610 | 0.614 |
| Other | 0.574 | 0.234-1.410 | 0.226 | 0.566 | 0.225-1.424 | 0.226 |
| Leukocyte count per 1 ×106/L increase | 0.962 | 0.902-1.027 | 0.246 | 0.957 | 0.890-1.030 | 0.244 |
| Neutrophil count per 1 × 106/L increase | 0.979 | 0.919-1.044 | 0.520 | 0.975 | 0.910-1.045 | 0.469 |
| Monocyte count per 1 ×106/L increase | 0.728 | 0.237-2.235 | 0.579 | 0.724 | 0.188-2.789 | 0.639 |
| Erythrocyte count per 1 ×106/L increase | 1.111 | 0.761-1.622 | 0.584 | 1.125 | 0.705-1.795 | 0.620 |
| Hemoglobin per 1 g/L increase | 0.995 | 0.982-1.009 | 0.521 | 0.995 | 0.979-1.010 | 0.501 |
| Total protein per 1 g/L increase | 1.001 | 0.973-1.030 | 0.936 | 1.001 | 0.971-1.032 | 0.942 |
| Albumin per 1 g/L increase | 0.981 | 0.938-1.025 | 0.392 | 0.979 | 0.932-1.027 | 0.384 |
| Globulin per 1 g/L increase | 1.030 | 0.979-1.084 | 0.257 | 1.034 | 0.974-1.099 | 0.274 |
| Total bilirubin per 1 Umol/L increase | 1.050 | 1.016-1.085 | 0.004 | 1.072 | 1.003-1.146 | 0.039 |
| Urea nitrogen per 1 mmol/L increase | 0.991 | 0.950-1.035 | 0.689 | 0.991 | 0.943-1.041 | 0.708 |
| Creatinine per 1 umol/L increase | 1.000 | 0.999-1.001 | 0.896 | 1.000 | 0.999-1.001 | 0.955 |
| Uric acid per 1 umol/L increase | 0.999 | 0.996-1.002 | 0.620 | 0.999 | 0.996-1.002 | 0.627 |
| Potassium per 1 mmol/L increase | 0.713 | 0.473-1.074 | 0.105 | 0.713 | 0.452-1.124 | 0.145 |
| Sodium per 1 mmol/L increase | 0.971 | 0.907-1.040 | 0.399 | 0.968 | 0.901-1.039 | 0.367 |
| Chlorine per 1 mmol/L increase | 0.987 | 0.928-1.050 | 0.677 | 0.985 | 0.918-1.057 | 0.675 |
| Calcium per 1 mmol/L increase | 0.736 | 0.213-2.544 | 0.629 | 0.709 | 0.210-2.398 | 0.580 |
| Infection type |  |  |  |  |  |  |
| Gram-positive strain | Reference | Reference | Reference | Reference | Reference | Reference |
| Gram-negative strain | 13.002 | 4.988-33.891 | 0.001 | 16.964 | 6.231-46.183 | 0.001 |
| Other | 5.738 | 2.172-15.153 | 0.001 | 6.525 | 2.449-17.381 | 0.001 |

Supplemental Table 2. Predictive value of univariate and multivariate models for treatment failure

| Variables | AUC | 95%CI | P |
| --- | --- | --- | --- |
| Univariate models |  |  |  |
| Lymphocyte count | 0.683 | 0.603-0.763 | 0.001 |
| Age | 0.515 | 0.427-0.603 | 0.739 |
| Dialysis age | 0.592 | 0.508-0.676 | 0.037 |
| CCI | 0.501 | 0.410-0.592 | 0.982 |
| Hemoglobin | 0.518 | 0.432-0.604 | 0.684 |
| Albumin | 0.528 | 0.444-0.612 | 0.523 |
| Total bilirubin | 0.645 | 0.563-0.728 | 0.001 |
| Multivariate models |  |  |  |
| Model A | 0.705 | 0.603-0.763 | 0.001 |
| Model B | 0.728 | 0.651-0.805 | 0.001 |
| Model C | 0.824 | 0.767-0.881 | 0.001 |

Model A, lymphocyte count + demographic characteristics (age, sex, dialysis age, CCI and etiology of kidney failure); Model B, Model A + laboratory variables (hemoglobin, albumin and total bilirubin); C, Model B + infection type (Gram-positive strain, Gram-negative strain and other strain infection). AUC: area under the receiver operating characteristic curve; CI: confidence interval.

Supplemental Table 3. Subgroup analysis of different lymphocyte count groups and PDAP treatment failure

| Subgroup | | No. Of patients | VLLC Group | LLC Group | NLC Group | P for interaction | Lymphocyte count per 1×106/L increase | P for interaction |
| --- | --- | --- | --- | --- | --- | --- | --- | --- |
| Overall |  | 286 | 2.701 (1.168, 6.247) | 2.265 (0.908, 5.646) | Reference | 0.020 | 0.250 (0.120-0.520) | 0.001 |
| Sex |  |  |  |  |  | 0.988 |  | 0.507 |
|  | Male | 138 | 4.006 (0.484, 33.189) | 3.299 (0.382, 28.472) | Reference |  | 0.328 (0.071, 1.511) |  |
|  | Female | 148 | 2.872 (0.938, 8.793) | 2.389 (0.750, 7.608) | Reference |  | 0.291 (0.108, 0.782) |  |
| Age |  |  |  |  |  | 0.595 |  | 1.041 |
|  | < 55 years old | 132 | 4.050 (1.029, 15.943) | 2.850 (0.706, 11.501) | Reference |  | 0.237 (0.079, 0.713) |  |
|  | ≧ 55 years old | 154 | 5.333 (1.529, 18.602) | 3.300 (0.921, 11.823) | Reference |  | 0.306 (0.097, 0.958) |  |
| Dialysis age |  |  |  |  |  | 0.361 |  | 0.071 |
|  | Short dialysis age | 143 | 2.032 (0.546, 7.556) | 1.733 (0.451, 6.660) | Reference |  | 0.842 (0.273, 2.598) |  |
|  | Long dialysis age | 143 | 2.938 (0.899, 9.603) | 2.378 (0.668, 8.471) | Reference |  | 0.232 (0.075, 0.719) |  |
| Renal anemia |  |  |  |  |  | 0.529 |  | 0.892 |
|  | Yes | 222 | 3.609 (1.303, 9.995) | 2.594 (0.860, 7.820) | Reference |  | 0.092 (0.008, 1.075) |  |
|  | No | 64 | 4.987 (0.394, 63.069) | 5.692 (0.678, 47.783) | Reference |  | 0.297 (0118, 0.747) |  |
| Albumin |  |  |  |  |  | 0.280 |  | 0.788 |
|  | < 28.50 g/L | 170 | 2.671 (1.016, 7.021) | 2.441 (0.808, 7.374) | Reference |  | 0.336 (0.133, 0.852) |  |
|  | ≧ 28.50 g/L | 116 | 3.214 (0.316, 32.694) | 2.856 (0.314, 25.969) | Reference |  | 0.179 (0.179, 5.958) |  |
| Total bilirubin |  |  |  |  |  | 0.787 |  | 0.434 |
|  | < 8.25 Umol/L | 143 | 2.902 (0.881, 9.558) | 1.083 (0.249, 4.716) | Reference |  | 0.342 (0.106, 1.096) |  |
|  | ≧ 8.25 Umol/L | 143 | 3.106 (0.848, 11.379) | 3.503 (0.911, 13.475) | Reference |  | 0.494 (0.175, 1.392) |  |
| Abbreviations: PDAP, peritoneal dialysis-associated peritonitis; VLLC, very low lymphocyte count; LLC, Low lymphocyte count; NLC, normal lymphocyte count. | | | | | | | | |

Supplemental Table 4. Associations between 4-level categorical variable of baseline peripheral blood lymphocyte counts and treatment failure

|  | | COX Regression | | | Generalized Estimated Equation | | |
| --- | --- | --- | --- | --- | --- | --- | --- |
| Hazard Ratios | 95% CI | P value | Odds Ratios | 95% CI | P value |
| Crude |  |  |  |  |  |  |  |
|  | Q1 | 5.901 | 2.250-15.475 | 0.001 | 6.943 | 2.422-19.904 | 0.001 |
|  | Q2 | 3.021 | 1.088-8.389 | 0.034 | 3.337 | 1.130-9.851 | 0.029 |
|  | Q3 | 2.221 | 0.759-6.498 | 0.145 | 2.224 | 0.707-6.997 | 0.172 |
|  | Q4 | Reference | Reference | Reference | Reference | Reference | Reference |
| Model A |  |  |  |  |  |  |  |
|  | Q1 | 5.802 | 2.161-15.579 | 0.001 | 6.883 | 2.344-20.209 | 0.001 |
|  | Q2 | 3.172 | 1.116-9.016 | 0.030 | 3.585 | 1.239-10.372 | 0.019 |
|  | Q3 | 2.343 | 0.794-6.912 | 0.123 | 2.374 | 0.738-7.641 | 0.147 |
|  | Q4 | Reference | Reference | Reference | Reference | Reference | Reference |
| Model B |  |  |  |  |  |  |  |
|  | Q1 | 5.369 | 1.961-14.704 | 0.001 | 6.031 | 2.034-17.884 | 0.001 |
|  | Q2 | 2.600 | 0.883-7.661 | 0.083 | 2.918 | 0.998-8.527 | 0.050 |
|  | Q3 | 2.408 | 0.813-7.131 | 0.113 | 2.408 | 0.741-7.832 | 0.144 |
|  | Q4 | Reference | Reference | Reference | Reference | Reference | Reference |
| Model C |  |  |  |  |  |  |  |
|  | Q1 | 4.099 | 1.484-11.325 | 0.007 | 4.571 | 1.450-14.411 | 0.009 |
|  | Q2 | 2.209 | 0.735-6.637 | 0.158 | 2.538 | 0.825-7.813 | 0.104 |
|  | Q3 | 2.379 | 0.792-7.144 | 0.122 | 2.279 | 0.656-7.913 | 0.195 |
|  | Q4 | Reference | Reference | Reference | Reference | Reference | Reference |

Q1, lymphocyte count < 0.63 × 106/L; Q2, lymphocyte count, 0.63-0.88 × 106/L; Q3, lymphocyte count, 0.88-1.25 × 106/L; Q4, lymphocyte count ≥1.25 × 106/L. Model A, lymphocyte count + demographic characteristics (age, sex, dialysis age, CCI and etiology of kidney failure); Model B, Model A + laboratory variables (hemoglobin, albumin and total bilirubin); C, Model B + infection type (Gram-positive strain, Gram-negative strain and other strain infection).
